# Supplementary material
Source: PubMed Central journal article supplement (PMC2576724)
Supplement: supp_82_suppl-3_iii71__1.pdf [file supp_82_suppl-3_iii71__1.pdf]

Raw data for figure 2

| Parameter                        | Generalised epidemics |      |                |      | Low level and concentrated epidemics |      |                     |      |                   |      |
|----------------------------------|-----------------------|------|----------------|------|--------------------------------------|------|---------------------|------|-------------------|------|
|                                  | With survey           |      | Without survey |      | Good quality data                    |      | Medium quality data |      | Poor quality data |      |
|                                  | Low                   | High | Low            | High | Low                                  | High | Low                 | High | Low               | High |
| Adult HIV prevalence             | 18%                   | 19%  | 46%            | 59%  | 40%                                  | 67%  | 38%                 | 102% | 53%               | 183% |
| HIV+ adults                      | 18%                   | 18%  | 45%            | 57%  | 40%                                  | 66%  | 38%                 | 100% | 52%               | 179% |
| HIV+ adult males                 | 18%                   | 18%  | 50%            | 75%  | 40%                                  | 106% | 44%                 | 109% | 57%               | 238% |
| HIV+ adult females               | 18%                   | 18%  | 52%            | 68%  | 49%                                  | 77%  | 47%                 | 112% | 58%               | 186% |
| 15–24 year old male prevalence   | 18%                   | 19%  | 56%            | 72%  |                                      |      |                     |      |                   |      |
| 15–24 year old female prevalence | 18%                   | 19%  | 56%            | 72%  |                                      |      |                     |      |                   |      |
| New adult infections             | 24%                   | 26%  | 47%            | 67%  | 48%                                  | 181% | 44%                 | 319% | 60%               | 938% |

| Parameter            | Generalised epidemics |      |                |      | Low level and concentrated epidemics |      |                     |      |                   |       |
|----------------------|-----------------------|------|----------------|------|--------------------------------------|------|---------------------|------|-------------------|-------|
|                      | With survey           |      | Without survey |      | Good quality data                    |      | Medium quality data |      | Poor quality data |       |
|                      | Low                   | High | Low            | High | Low                                  | High | Low                 | High | Low               | High  |
| Adult AIDS deaths    | 28%                   | 24%  | 46%            | 57%  | 39%                                  | 49%  | 36%                 | 47%  | 48%               | 61%   |
| HIV+ children        | 63%                   | 105% | 67%            | 136% | 73%                                  | 153% | 72%                 | 135% | 77%               | 153%  |
| New child infections | 48%                   | 44%  | 57%            | 80%  | 56%                                  | 83%  | 53%                 | 120% | 63%               | 197%  |
| Child AIDS deaths    | 54%                   | 66%  | 61%            | 95%  | 64%                                  | 105% | 63%                 | 137% | 79%               | 210%  |
| AIDS orphans         | 25%                   | 29%  | 44%            | 55%  |                                      |      |                     |      |                   |       |
| Total HIV+           | 18%                   | 19%  | 45%            | 57%  | 40%                                  | 65%  | 38%                 | 99%  | 52%               | 176%  |
| Total new infections | 22%                   | 23%  | 47%            | 66%  | 45%                                  | 205% | 43%                 | 310% | 60%               | 1136% |
| Total AIDS deaths    | 31%                   | 32%  | 47%            | 64%  | 40%                                  | 51%  | 36%                 | 49%  | 48%               | 67%   |
