# Supplementary material
Source: PubMed Central journal article supplement (PMC2576724)

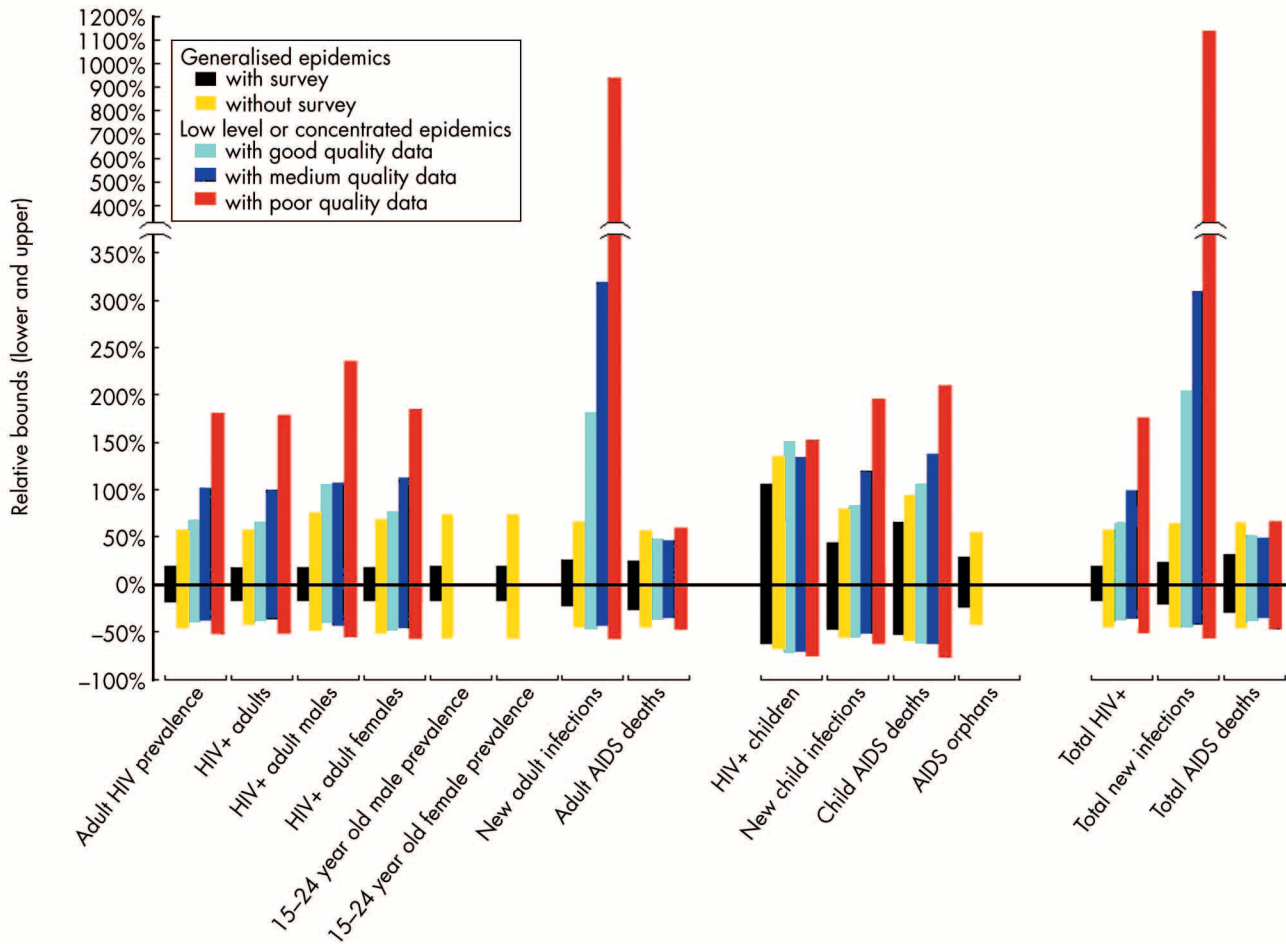

Supplement: supp_82_suppl-3_iii71_v2_1.pdf [file supp_82_suppl-3_iii71_v2_1.pdf]
